# Supplementary material
Source: publisher figshare collection journal article supplement (https://sage.figshare.com/ndownloader/files/18737117)
Supplement: Supplementary file 1 [file 18737117]

## Author Response 1

### Reviewer 1

**Comment:** My only minor comment is to slightly expand the discussion section focusing on clinical relevance. I suggest reading the editorial "Idiopathic Pulmonary Fibrosis and Emphysema: Between Scylla and Charybdis" (Respiration. 2016;92(4):215-217) and adding it in your references.

Response: This has been revised in the discussion section (Page 10, lines 161-164, 170-171). The reference has been added to the revised manuscript (Page 17, lines 270-271).

### Reviewer 2

**Comment:** Page 4, line 53. Change " eight patients combined" to "eight patients with combined".

Response: Thanks for your careful review. We have revised our manuscript accordingly.

If you have any more queries about this study, please don't hesitate to contact us. Thank you and best regards.

Sincerely yours,

Dr. Chun-guo Jiang

Department of Respiratory and Critical Care Medicine, Beijing Institute of Respiratory Medicine,  
Beijing Chaoyang Hospital, Capital Medical University, Beijing, China
